# Supplementary material for: Outcome heterogeneity of TP53-mutated myeloid neoplasms and the role of allogeneic hematopoietic cell transplantation
Source: PubMed Central journal article supplement — Haematologica. 2023 Sep 21;109(3):948–52. doi: 10.3324/haematol.2023.283886 (PMC10905097; doi:10.3324/haematol.2023.283886), 2023-09-21
Supplement: 2023_283886_PASCA_SUPPL.pdf [file 2023_283886_PASCA_SUPPL.pdf]

# Outcome heterogeneity of *TP53*-mutated myeloid neoplasms and the role of allogeneic hematopoietic cell transplantation

Sergiu Pasca, Saurav D. Haldar, Alexander Ambinder, Jonathan A. Webster, Tania Jain, W. Brian Dalton, Gabrielle T. Prince, Gabriel Ghiaur, Amy E. DeZern, Ivana Gojo, B. Douglas Smith, Theodoros Karantanos, Cory Schulz, Kristin Stokvis, Mark J. Levis, Richard J. Jones and Lukasz P. Gondek

Division of Hematological Malignancies, Sidney Kimmel Comprehensive Cancer Center, Johns Hopkins University, Baltimore, MD, USA

Correspondence:

L.P. GONDEK - [lgondek1@jhmi.edu](mailto:lgondek1@jhmi.edu)

<https://doi.org/10.3324/haematol.2023.283886>

## **Supplemental Materials**

For Pasca, et al. Outcome Heterogeneity of TP53-Mutated Myeloid Neoplasms  
and the Role of Allogenic Hematopoietic Cell Transplantation.

Table of Content

Supplemental Table 1 ..... 3  
Supplemental Table 2 ..... 4  
Supplemental Table 3 ..... 7

### Supplemental Table 1

Targeted NGS gene panel.

| <b>NGS panel</b> |        |        |
|------------------|--------|--------|
| ABL1             | GATA2  | NUP98  |
| ASXL1            | GNAS   | PDGFRA |
| ATM              | IDH1   | PHF6   |
| ATRX             | IDH2   | PIGA   |
| BCOR             | IKZF1  | PTEN   |
| BCORL1           | JAK2   | PTPN11 |
| BRAF             | KDM2B  | RAD50  |
| CALR             | KDM6A  | RECQL4 |
| CBL              | KIT    | RUNX1  |
| CBLB             | KMT2A  | SETBP1 |
| CDKN2A           | KMT2D  | SF3B1  |
| CEBPA            | KRAS   | SRSF2  |
| CSF3R            | MPL    | STAG2  |
| DNMT3A           | NF1    | STAT3  |
| EP300            | NLRP1  | TET2   |
| ERBB2            | NOTCH1 | TP53   |
| ETV6             | NOTCH2 | U2AF1  |
| EZH2             | NPM1   | WT1    |
| FLT3             | NRAS   | ZRSR2  |
| GATA1            | NSD1   |        |

## Supplemental Table 2

TP53 variants present in the cohort.

| Patient | Gene | AA_change          | VAF   | Varsome           | cDNASplice | Del17p13.1 | MultiMut | CN-LOH | Cytogenetics |
|---------|------|--------------------|-------|-------------------|------------|------------|----------|--------|--------------|
| 1       | TP53 | p.R267_F270delinsL | 51.88 | Pathogenic        | NA         | TRUE       | FALSE    | FALSE  | CK           |
| 2       | TP53 | p.D184fs           | 18.67 | Pathogenic        | NA         | FALSE      | TRUE     | FALSE  | CK           |
| 2       | TP53 | p.I255N            | 15.54 | Pathogenic        | NA         | FALSE      | TRUE     | FALSE  | CK           |
| 3       | TP53 | p.C275F            | 38.53 | Pathogenic        | NA         | FALSE      | TRUE     | FALSE  | CK           |
| 3       | TP53 | p.I254T            | 36.67 | Pathogenic        | NA         | FALSE      | TRUE     | FALSE  | CK           |
| 4       | TP53 | p.D281V            | 19.16 | Pathogenic        | NA         | TRUE       | FALSE    | FALSE  | CK           |
| 5       | TP53 | p.P190A            | 34.29 | Pathogenic        | NA         | NA         | FALSE    | FALSE  | NA           |
| 6       | TP53 | p.Q165*            | 27.96 | Pathogenic        | NA         | FALSE      | FALSE    | FALSE  | CK           |
| 7       | TP53 | p.L344P            | 3.1   | Pathogenic        | NA         | TRUE       | FALSE    | FALSE  | CK           |
| 8       | TP53 | p.Y220C            | 77.4  | Pathogenic        | NA         | TRUE       | FALSE    | FALSE  | CK           |
| 9       | TP53 | p.C242Y            | 54.43 | Pathogenic        | NA         | FALSE      | FALSE    | FALSE  | CK           |
| 10      | TP53 | p.R248P            | 78.16 | Pathogenic        | NA         | NA         | FALSE    | FALSE  | NA           |
| 11      | TP53 | p.Y163N            | 14.02 | Pathogenic        | NA         | FALSE      | FALSE    | FALSE  | CK           |
| 12      | TP53 | p.R273H            | 35.76 | Pathogenic        | NA         | TRUE       | FALSE    | FALSE  | CK           |
| 13      | TP53 | p.D281N            | 97.54 | Pathogenic        | NA         | TRUE       | FALSE    | FALSE  | Non-CK       |
| 14      | TP53 | p.P152fs           | 56.43 | Pathogenic        | NA         | FALSE      | FALSE    | FALSE  | CK           |
| 15      | TP53 | p.C135Y            | 63.76 | Pathogenic        | NA         | FALSE      | FALSE    | TRUE   | CK           |
| 16      | TP53 | p.N210fs           | 44.5  | Likely pathogenic | NA         | FALSE      | FALSE    | FALSE  | Non-CK       |
| 17      | TP53 | p.R175H            | 68.01 | Pathogenic        | NA         | FALSE      | FALSE    | TRUE   | CK           |
| 18      | TP53 | p.V225fs           | 6.02  | Pathogenic        | NA         | FALSE      | TRUE     | FALSE  | Non-CK       |
| 18      | TP53 | p.R273C            | 6.16  | Pathogenic        | NA         | FALSE      | TRUE     | FALSE  | Non-CK       |
| 19      | TP53 | p.R213*            | 7.86  | Pathogenic        | NA         | FALSE      | TRUE     | FALSE  | CK           |
| 19      | TP53 | p.V218G            | 9.48  | Pathogenic        | NA         | FALSE      | TRUE     | FALSE  | CK           |
| 20      | TP53 | p.P151A            | 32.72 | Pathogenic        | NA         | TRUE       | FALSE    | FALSE  | CK           |
| 21      | TP53 | p.R248Q            | 19.33 | Pathogenic        | NA         | FALSE      | FALSE    | FALSE  | Non-CK       |
| 22      | TP53 | p.R273L            | 4.2   | Pathogenic        | NA         | FALSE      | FALSE    | FALSE  | Non-CK       |
| 23      | TP53 | p.R175H            | 14.59 | Pathogenic        | NA         | TRUE       | FALSE    | FALSE  | Non-CK       |
| 24      | TP53 | p.R273H            | 71.88 | Pathogenic        | NA         | FALSE      | FALSE    | FALSE  | Non-CK       |
| 25      | TP53 | X_splice           | None  | NA                | NA         | FALSE      | FALSE    | NA     | Non-CK       |
| 26      | TP53 | p.R248Q            | 11.21 | Pathogenic        | NA         | FALSE      | FALSE    | FALSE  | Non-CK       |
| 27      | TP53 | p.C238F            | 20.78 | Pathogenic        | NA         | FALSE      | TRUE     | FALSE  | Non-CK       |
| 27      | TP53 | p.R175H            | 30.84 | Pathogenic        | NA         | FALSE      | TRUE     | FALSE  | Non-CK       |
| 28      | TP53 | p.H179R            | 9.01  | Pathogenic        | NA         | FALSE      | FALSE    | FALSE  | Non-CK       |
| 29      | TP53 | p.I195F            | 9     | Pathogenic        | NA         | FALSE      | FALSE    | FALSE  | CK           |
| 30      | TP53 | p.V143M            | 40.43 | Likely pathogenic | NA         | FALSE      | FALSE    | FALSE  | CK           |
| 31      | TP53 | X331_splice        | 75.04 | Pathogenic        | c.993+1G>A | FALSE      | FALSE    | FALSE  | CK           |

|    |      |                    |       |                   |               |       |       |       |        |
|----|------|--------------------|-------|-------------------|---------------|-------|-------|-------|--------|
| 32 | TP53 | p.A161T            | 62.92 | Pathogenic        | NA            | TRUE  | FALSE | FALSE | CK     |
| 33 | TP53 | p.H178_E180delinsQ | 16.42 | Pathogenic        | NA            | TRUE  | FALSE | FALSE | CK     |
| 34 | TP53 | p.S106R            | 82.9  | VUS               | NA            | TRUE  | FALSE | FALSE | CK     |
| 35 | TP53 | p.Y220C            | 19.13 | Pathogenic        | NA            | FALSE | FALSE | FALSE | CK     |
| 36 | TP53 | p.C176Y            | 94.72 | Pathogenic        | NA            | FALSE | FALSE | TRUE  | CK     |
| 37 | TP53 | p.C242S            | 42.36 | Pathogenic        | NA            | FALSE | FALSE | FALSE | CK     |
| 38 | TP53 | p.Q38*             | 31.16 | Likely pathogenic | NA            | FALSE | TRUE  | FALSE | CK     |
| 38 | TP53 | p.R248W            | 29.36 | Pathogenic        | NA            | FALSE | TRUE  | FALSE | CK     |
| 39 | TP53 | p.A161T            | 40.23 | Pathogenic        | NA            | FALSE | TRUE  | FALSE | CK     |
| 39 | TP53 | p.P151R            | 42.69 | Pathogenic        | NA            | FALSE | TRUE  | FALSE | CK     |
| 40 | TP53 | p.K132R            | 35.55 | Pathogenic        | NA            | NA    | FALSE | FALSE | NA     |
| 41 | TP53 | p.P191del          | 27.24 | Pathogenic        | NA            | FALSE | FALSE | FALSE | Non-CK |
| 42 | TP53 | p.R248Q            | 23.48 | Pathogenic        | NA            | FALSE | FALSE | FALSE | Non-CK |
| 43 | TP53 | X307_splice        | 85.44 | Pathogenic        | c.920-2A>G    | FALSE | FALSE | TRUE  | CK     |
| 44 | TP53 | p.G266E            | 32.31 | Pathogenic        | NA            | TRUE  | FALSE | FALSE | CK     |
| 45 | TP53 | p.R273H            | 25.26 | Pathogenic        | NA            | FALSE | FALSE | FALSE | CK     |
| 46 | TP53 | p.F270S            | 91.85 | Pathogenic        | NA            | TRUE  | FALSE | FALSE | CK     |
| 47 | TP53 | p.Q167*            | 43    | Pathogenic        | NA            | FALSE | TRUE  | FALSE | CK     |
| 47 | TP53 | p.V272M            | 3.8   | Pathogenic        | NA            | FALSE | TRUE  | FALSE | CK     |
| 48 | TP53 | p.R337C            | 87.8  | Pathogenic        | NA            | FALSE | FALSE | TRUE  | CK     |
| 49 | TP53 | p.C238S            | 23.41 | Pathogenic        | NA            | FALSE | FALSE | FALSE | CK     |
| 50 | TP53 | p.W91*             | 40.95 | Pathogenic        | NA            | TRUE  | FALSE | FALSE | CK     |
| 51 | TP53 | c.673-681 del      | 53    | Pathogenic        | c.673-681 del | TRUE  | FALSE | FALSE | CK     |
| 52 | TP53 | p.K132R            | 79.12 | Pathogenic        | NA            | TRUE  | FALSE | FALSE | CK     |
| 53 | TP53 | p.P151fs           | 28.01 | Pathogenic        | NA            | FALSE | TRUE  | FALSE | CK     |
| 53 | TP53 | p.R248G            | 45    | Pathogenic        | NA            | FALSE | TRUE  | FALSE | CK     |
| 54 | TP53 | p.Y236C            | 71.5  | Pathogenic        | NA            | TRUE  | FALSE | FALSE | CK     |
| 55 | TP53 | p.R273C            | 60.13 | Pathogenic        | NA            | FALSE | FALSE | TRUE  | CK     |
| 56 | TP53 | p.C242F            | 29.5  | Pathogenic        | NA            | TRUE  | FALSE | FALSE | CK     |
| 57 | TP53 | p.G245D            | 6.5   | Pathogenic        | NA            | TRUE  | FALSE | FALSE | CK     |
| 58 | TP53 | p.K132fs           | 67.78 | Pathogenic        | NA            | TRUE  | FALSE | FALSE | CK     |
| 59 | TP53 | p.Y220C            | 14.15 | Pathogenic        | NA            | TRUE  | FALSE | FALSE | CK     |
| 60 | TP53 | p.G245S            | 82.41 | Pathogenic        | NA            | TRUE  | FALSE | FALSE | CK     |
| 61 | TP53 | p.Y220C            | 7.01  | Pathogenic        | NA            | TRUE  | FALSE | FALSE | CK     |
| 62 | TP53 | p.R248W            | 97.56 | Pathogenic        | NA            | FALSE | FALSE | TRUE  | CK     |
| 63 | TP53 | p.K132R            | 86.53 | Pathogenic        | NA            | FALSE | FALSE | TRUE  | Non-CK |
| 64 | TP53 | p.Y163C            | 75.5  | Pathogenic        | NA            | TRUE  | FALSE | FALSE | CK     |
| 65 | TP53 | p.S241F            | 41.88 | Pathogenic        | NA            | TRUE  | FALSE | FALSE | CK     |
| 66 | TP53 | p.W146*            | 41.99 | Pathogenic        | NA            | FALSE | TRUE  | FALSE | CK     |

|    |      |             |       |                   |            |       |       |       |        |
|----|------|-------------|-------|-------------------|------------|-------|-------|-------|--------|
| 66 | TP53 | X187_splice | 44.86 | Pathogenic        | c.560-2A>C | FALSE | TRUE  | FALSE | CK     |
| 67 | TP53 | p.Y234C     | 90.33 | Pathogenic        | NA         | TRUE  | FALSE | FALSE | Non-CK |
| 68 | TP53 | X332_splice | 85.24 | Pathogenic        | c.994-1G>A | TRUE  | FALSE | FALSE | CK     |
| 69 | TP53 | p.R282W     | 33.26 | Pathogenic        | NA         | TRUE  | FALSE | FALSE | CK     |
| 70 | TP53 | p.S303fs    | 86.5  | Likely pathogenic | NA         | FALSE | FALSE | TRUE  | CK     |
| 71 | TP53 | p.R249W     | 39.07 | Pathogenic        | NA         | FALSE | TRUE  | FALSE | CK     |
| 71 | TP53 | p.Y205C     | 39.01 | Pathogenic        | NA         | FALSE | TRUE  | FALSE | CK     |
| 72 | TP53 | p.V73fs     | 75.14 | Pathogenic        | NA         | TRUE  | FALSE | FALSE | CK     |
| 73 | TP53 | p.R248L     | 32.74 | Pathogenic        | NA         | FALSE | FALSE | FALSE | Non-CK |
| 74 | TP53 | p.K382fs    | 19.03 | Pathogenic        | NA         | FALSE | TRUE  | FALSE | CK     |
| 74 | TP53 | p.Y163C     | 20.45 | Pathogenic        | NA         | FALSE | TRUE  | FALSE | CK     |
| 75 | TP53 | X331_splice | 63.1  | Pathogenic        | c.993+1G>A | TRUE  | FALSE | FALSE | CK     |
| 76 | TP53 | p.R213L     | 12.08 | Pathogenic        | NA         | FALSE | FALSE | FALSE | CK     |
| 77 | TP53 | p.H47Y      | 32.2  | Pathogenic        | NA         | TRUE  | FALSE | FALSE | CK     |
| 78 | TP53 | p.R273H     | 30.54 | Pathogenic        | NA         | TRUE  | FALSE | FALSE | CK     |
| 79 | TP53 | p.R273H     | 84.69 | Pathogenic        | NA         | FALSE | FALSE | TRUE  | CK     |
| 80 | TP53 | p.C275Y     | 39.1  | Pathogenic        | NA         | FALSE | FALSE | FALSE | CK     |
| 81 | TP53 | p.P128fs    | 46.64 | Pathogenic        | NA         | FALSE | FALSE | FALSE | CK     |
| 82 | TP53 | p.H214R     | 45.77 | Pathogenic        | NA         | FALSE | TRUE  | FALSE | CK     |
| 82 | TP53 | X307_splice | 46.38 | Pathogenic        | c.920-2A>G | FALSE | TRUE  | FALSE | CK     |
| 83 | TP53 | p.S261fs    | 36.49 | Likely pathogenic | NA         | TRUE  | FALSE | FALSE | CK     |
| 84 | TP53 | p.R249W     | 6.69  | Pathogenic        | NA         | FALSE | FALSE | FALSE | CK     |
| 85 | TP53 | p.V216M     | 63.25 | Pathogenic        | NA         | FALSE | FALSE | TRUE  | CK     |
| 86 | TP53 | p.H179Q     | 66.29 | Pathogenic        | NA         | FALSE | FALSE | FALSE | CK     |
| 87 | TP53 | X261_splice | 5.29  | Pathogenic        | c.783-1G>A | FALSE | FALSE | FALSE | CK     |
| 88 | TP53 | p.Y220C     | 54.36 | Pathogenic        | NA         | TRUE  | FALSE | FALSE | CK     |
| 89 | TP53 | p.N239D     | 81.12 | Pathogenic        | NA         | NA    | FALSE | FALSE | NA     |
| 90 | TP53 | p.R175H     | 46.97 | Pathogenic        | NA         | FALSE | TRUE  | FALSE | CK     |
| 90 | TP53 | p.S215N     | 41.44 | Pathogenic        | NA         | FALSE | TRUE  | FALSE | CK     |
| 91 | TP53 | X224_splice | 51.2  | Pathogenic        | c.672+1G>T | TRUE  | FALSE | FALSE | CK     |
| 92 | TP53 | p.E286K     | 74.13 | Pathogenic        | NA         | TRUE  | FALSE | FALSE | CK     |
| 93 | TP53 | p.W91*      | 54.75 | Pathogenic        | NA         | TRUE  | FALSE | FALSE | CK     |

AA, amino acid; VAF, variant allele frequency; VUS, variant of unknown significance; CN-LOH, copy-neutral loss of heterozygosity; CK, complex karyotype; NA, not available.

### Supplemental Table 3

Non-TP53 variants present in the cohort.

| Patient | Gene   | AA_change  | VAF   | Varsome           |
|---------|--------|------------|-------|-------------------|
| 1       | DNMT3A | p.R771*    | 68.31 | Pathogenic        |
| 1       | ATM    | p.A216S    | 41.61 | VUS               |
| 1       | PIGA   | c.848+1G>A | 75.22 | Likely pathogenic |
| 2       | ATM    | p.V410A    | 47.4  | VUS               |
| 3       | NA     | NA         | NA    | NA                |
| 4       | DNMT3A | p.R882C    | 9.63  | Pathogenic        |
| 4       | KMT2D  | p.P235T    | 53.13 | VUS               |
| 5       | TET2   | p.Q70*     | 10.79 | Likely pathogenic |
| 6       | CALR   | p.L367fs   | 11.36 | Pathogenic        |
| 7       | NA     | NA         | NA    | NA                |
| 8       | NA     | NA         | NA    | NA                |
| 9       | RECQL4 | p.E742D    | 57.92 | VUS               |
| 9       | EZH2   | p.D124V    | 5.3   | Pathogenic        |
| 10      | NLRP1  | p.T670I    | 87.84 | VUS               |
| 10      | NLRP1  | p.M686V    | 88.34 | VUS               |
| 11      | ATM    | p.Y2969C   | 49.83 | VUS               |
| 12      | NF1    | p.I679fs   | 6.83  | Pathogenic        |
| 12      | TET2   | p.H880R    | 49.29 | VUS               |
| 13      | KIT    | p.D816V    | 10.66 | Pathogenic        |
| 14      | NA     | NA         | NA    | NA                |
| 15      | JAK2   | p.V617F    | 41.15 | Pathogenic        |
| 16      | ASXL1  | p.G646fs   | 29.56 | Pathogenic        |
| 16      | PHF6   | p.E334fs   | 86.63 | Pathogenic        |
| 16      | ATM    | p.R981C    | 22.66 | VUS               |
| 16      | ZRSR2  | p.E231*    | 89.61 | Pathogenic        |
| 16      | JAK2   | p.V617F    | 48.61 | Pathogenic        |
| 17      | CEBPA  | p.P11L     | 56.25 | VUS               |
| 18      | CBLB   | p.H501Y    | 47.81 | VUS               |
| 18      | GNAS   | p.A38V     | 5.91  | VUS               |
| 19      | NA     | NA         | NA    | NA                |
| 20      | NA     | NA         | NA    | NA                |
| 21      | ASXL1  | p.T848fs   | 19.51 | Likely pathogenic |
| 21      | CBL    | p.R559*    | 26.05 | Likely pathogenic |
| 21      | IDH1   | p.R132H    | 33.26 | Pathogenic        |



|    |        |             |       |                   |
|----|--------|-------------|-------|-------------------|
| 21 | SETBP1 | p.R112W     | 48.9  | VUS               |
| 21 | U2AF1  | p.Q157P     | 25.83 | Pathogenic        |
| 22 | IDH1   | p.R132C     | 17.3  | Pathogenic        |
| 22 | NPM1   | p.W288fs    | 11.1  | Pathogenic        |
| 23 | NA     | NA          | NA    | NA                |
| 24 | U2AF1  | p.Q157P     | 38.47 | Pathogenic        |
| 26 | TET2   | p.Y1294C    | 47.13 | Pathogenic        |
| 26 | EP300  | p.V2273I    | 47.28 | VUS               |
| 26 | SRSF2  | p.P95R      | 47.27 | Pathogenic        |
| 26 | KIT    | p.H185N     | 18.55 | VUS               |
| 26 | KRAS   | p.G60V      | 22.65 | Pathogenic        |
| 26 | KIT    | p.D816V     | 19.9  | Pathogenic        |
| 26 | EP300  | c.3671+1G>A | 45.1  | Pathogenic        |
| 27 | ASXL1  | p.T848fs    | 24.35 | Likely pathogenic |
| 27 | RUNX1  | p.R233fs    | 15.86 | Likely pathogenic |
| 27 | ASXL1  | p.G646fs    | 10.96 | Pathogenic        |
| 27 | SF3B1  | p.E592K     | 42.37 | Likely pathogenic |
| 28 | SETBP1 | p.S869C     | 26.92 | Pathogenic        |
| 28 | SRSF2  | p.P95H      | 27.84 | Pathogenic        |
| 28 | ZRSR2  | c.827+1G>A  | 33.95 | Pathogenic        |
| 29 | NA     | NA          | NA    | NA                |
| 30 | U2AF1  | p.Q157P     | 39.71 | Pathogenic        |
| 31 | ATRX   | p.R149*     | 18.42 | Likely pathogenic |
| 32 | JAK2   | p.V617F     | 2.34  | Pathogenic        |
| 32 | ASXL1  | p.P808fs    | 3.36  | Pathogenic        |
| 32 | CALR   | p.K375fs    | 56.81 | Pathogenic        |
| 33 | ATM    | p.V1645L    | 46.61 | VUS               |
| 34 | NA     | NA          | NA    | NA                |
| 35 | PDGFRA | p.Y768C     | 50.73 | VUS               |
| 35 | RECQL4 | p.P103L     | 45.9  | VUS               |
| 36 | MPL    | p.P106L     | 52.48 | Pathogenic        |
| 36 | GATA2  | p.H258Q     | 48.65 | VUS               |
| 37 | NLRP1  | p.S1395L    | 71.17 | VUS               |
| 38 | NA     | NA          | NA    | NA                |
| 39 | NLRP1  | p.L71H      | 51.6  | VUS               |
| 40 | U2AF1  | p.S34Y      | 33.22 | Pathogenic        |
| 40 | ASXL1  | p.R1224W    | 48.93 | VUS               |
| 41 | SF3B1  | p.N626D     | 41.63 | Pathogenic        |
| 41 | EZH2   | p.N263fs    | 22.67 | Pathogenic        |

|    |        |              |       |                   |
|----|--------|--------------|-------|-------------------|
| 41 | KMT2D  | p.M1660V     | 48.71 | VUS               |
| 41 | ASXL1  | p.G646fs     | 25.57 | Pathogenic        |
| 41 | EZH2   | c.2110+1G>A  | 31.86 | Pathogenic        |
| 42 | NRAS   | p.T58I       | 5.68  | Pathogenic        |
| 42 | TET2   | p.Q1435*     | 21.44 | Pathogenic        |
| 42 | ATM    | p.K2253E     | 49.16 | VUS               |
| 42 | DNMT3A | p.R882C      | 42.92 | Pathogenic        |
| 43 | ERBB2  | p.P489L      | 53.04 | VUS               |
| 43 | NUP98  | p.H1653P     | 51.23 | VUS               |
| 43 | RECQL4 | p.E823K      | 58.97 | VUS               |
| 44 | RUNX1  | p.T92A       | 49.63 | Pathogenic        |
| 44 | ATRX   | p.I435T      | 48.22 | VUS               |
| 45 | NOTCH1 | C155S        | 20.92 | VUS               |
| 46 | CALR   | p.Q365Rfs*50 | 37.59 | Pathogenic        |
| 47 | NA     | NA           | NA    | NA                |
| 48 | MPL    | p.R102P      | 44.07 | Likely pathogenic |
| 49 | ATM    | p.G2891D     | 6.41  | Pathogenic        |
| 50 | CSF3R  | p.Q776*      | 23.14 | Pathogenic        |
| 50 | U2AF1  | p.Q157R      | 40.96 | Pathogenic        |
| 52 | EP300  | p.N2171H     | 47.94 | VUS               |
| 53 | RECQL4 | p.R1181*     | 51.09 | Likely pathogenic |
| 54 | NA     | NA           | NA    | NA                |
| 55 | DNMT3A | p.R736H      | 40.84 | Pathogenic        |
| 55 | BCORL1 | p.R1266*     | 15.57 | Likely pathogenic |
| 55 | PTPN11 | p.A72V       | 6.09  | Pathogenic        |
| 55 | FLT3   | ITD 375      | 11    | Pathogenic        |
| 56 | GATA1  | p.P240A      | 19.11 | Pathogenic        |
| 56 | RECQL4 | p.A785V      | 32.66 | VUS               |
| 57 | IDH1   | p.R132H      | 13.3  | Pathogenic        |
| 58 | ERBB2  | p.G1056S     | 50.54 | VUS               |
| 59 | NA     | NA           | NA    | NA                |
| 60 | DNMT3A | p.V895L      | 48.17 | Likely pathogenic |
| 60 | EZH2   | p.R63*       | 45.5  | Likely pathogenic |
| 60 | KMT2D  | p.R265H      | 45.67 | VUS               |
| 60 | ASXL1  | p.Q748*      | 45.89 | Likely pathogenic |
| 60 | CALR   | p.L367fs     | 45.89 | Pathogenic        |
| 60 | TET2   | p.H800fs     | 54.74 | Likely pathogenic |
| 61 | SF3B1  | p.T7I        | 7.68  | VUS               |
| 62 | NRAS   | p.G12C       | 28.71 | Pathogenic        |

|    |        |             |       |                   |
|----|--------|-------------|-------|-------------------|
| 62 | PTPN11 | p.A72V      | 10.72 | Pathogenic        |
| 63 | KIT    | p.G565V     | 46.04 | VUS               |
| 64 | NA     | NA          | NA    | NA                |
| 65 | NA     | NA          | NA    | NA                |
| 66 | NA     | NA          | NA    | NA                |
| 67 | U2AF1  | p.Q157P     | 46.77 | Pathogenic        |
| 67 | KRAS   | p.G12D      | 42.81 | Pathogenic        |
| 68 | DNMT3A | p.V657G     | 44.15 | Pathogenic        |
| 69 | RECQL4 | p.M989I     | 48.97 | VUS               |
| 70 | SETBP1 | p.T826I     | 30.17 | VUS               |
| 71 | RECQL4 | p.L566P     | 46.27 | VUS               |
| 71 | ASXL1  | p.I579V     | 55.02 | VUS               |
| 72 | NA     | NA          | NA    | NA                |
| 73 | NLRP1  | p.R1438Q    | 47.53 | VUS               |
| 73 | SF3B1  | p.G740V     | 23.11 | Likely pathogenic |
| 74 | KMT2D  | p.P2193L    | 53.57 | VUS               |
| 74 | NOTCH2 | p.L834S     | 50.38 | VUS               |
| 74 | TET2   | p.C1142S    | 48.12 | Likely pathogenic |
| 75 | NA     | NA          | NA    | NA                |
| 76 | NRAS   | p.M111V     | 52.39 | Likely pathogenic |
| 76 | NF1    | p.I271T     | 43.98 | VUS               |
| 77 | NA     | NA          | NA    | NA                |
| 78 | NA     | NA          | NA    | NA                |
| 79 | KIT    | p.P627R     | 10.88 | Pathogenic        |
| 79 | KMT2A  | p.K2657N    | 9.48  | VUS               |
| 80 | NA     | NA          | NA    | NA                |
| 81 | KMT2D  | p.I2878T    | 52.42 | VUS               |
| 82 | ATM    | p.Y2969C    | 17.18 | VUS               |
| 83 | CDKN2A | p.N42K      | 50.57 | VUS               |
| 83 | DNMT3A | p.G550R     | 27.92 | Likely pathogenic |
| 84 | DNMT3A | p.Y528*     | 7.43  | Likely pathogenic |
| 85 | DNMT3A | p.R598*     | 5.05  | VUS               |
| 85 | SETBP1 | p.P1563S    | 31.24 | VUS               |
| 85 | WT1    | p.G191R     | 48.84 | VUS               |
| 85 | CSF3R  | p.A470T     | 50.55 | VUS               |
| 86 | RECQL4 | p.G387R     | 47.3  | VUS               |
| 86 | NF1    | c.2850+1G>A | 34.44 | Pathogenic        |
| 87 | KMT2A  | p.S843C     | 49.19 | VUS               |
| 88 | NA     | NA          | NA    | NA                |

|    |        |             |       |                   |
|----|--------|-------------|-------|-------------------|
| 89 | TET2   | c.3595-1G>C | 70    | Pathogenic        |
| 90 | NA     | NA          | NA    | NA                |
| 91 | NA     | NA          | NA    | NA                |
| 92 | RUNX1  | p.Q272*     | 37.96 | Pathogenic        |
| 92 | PHF6   | p.F260fs    | 62.24 | Pathogenic        |
| 92 | EZH2   | p.D730*     | 26.19 | Pathogenic        |
| 93 | NOTCH2 | p.T2111A    | 48.14 | VUS               |
| 93 | DNMT3A | p.R742P     | 32.34 | VUS               |
| 93 | ETV6   | p.L117F     | 27.91 | Likely pathogenic |

AA, amino acid; VAF, variant allele frequency; VUS, variant of unknown significance; NA, not available;
